# 1 Subordinate effect of -21M HLA-B dimorphism on NK cell repertoire diversity 2 and function in HIV-1 infected individuals of African origin

3 Elia Moreno Cubero<sup>1</sup>, Ane Ogbe<sup>1</sup>, Myron S. Cohen<sup>2</sup>, Barton F. Haynes<sup>3</sup>, Persephone Borrow<sup>1</sup>, Dimitra  
4 Peppas<sup>1,4\*</sup>

5 <sup>1</sup>Nuffield Dept of Clinical Medicine, University of Oxford, Oxford OX3 7FZ,UK; <sup>2</sup> University of North  
6 Carolina at Chapel Hill, Chapel Hill, NC 27599, USA; <sup>3</sup> Duke University Human Vaccine Institute, Duke  
7 University School of Medicine, Durham NC 27710, USA; <sup>4</sup>Mortimer Market Centre, Department of  
8 HIV, CNWL NHS Trust, London, UK.

9 \* **Correspondence:**

10 [dimitra.peppas@ndm.ox.ac.uk](mailto:dimitra.peppas@ndm.ox.ac.uk)

11 Keywords: Natural Killer Cells, HIV-1, HLA-B

## 12 13 Abstract

14 Natural Killer (NK) cells play an important role in antiviral defence and their potent effector function  
15 identifies them as key candidates for immunotherapeutic interventions in chronic viral infections.  
16 Their remarkable functional agility is achieved by virtue of a wide array of germline encoded  
17 inhibitory and activating receptors ensuring a self-tolerant and tunable repertoire. NK cell diversity is  
18 generated by a combination of factors including genetic determinants and infections/environmental  
19 factors, which together shape the NK cell pool and functional potential. Recently a genetic  
20 polymorphism at position -21 of HLA-B, which influences the supply of HLA-E binding peptides and  
21 availability of HLA-E for recognition by the inhibitory NK cell receptor NKG2A, was shown to have a  
22 marked influence on NK cell functionality in healthy human cytomegalovirus (HCMV) seronegative  
23 Caucasian individuals. In this study, -21 methionine (M)-expressing alleles supplying HLA-E binding  
24 peptides were largely poor ligands for inhibitory killer immunoglobulin-like receptors (KIRs), and a  
25 bias to NKG2A-mediated education of functionally-potent NK cells was observed. Here, we  
26 investigated the effect of this polymorphism on the phenotype and functional capacity of NK cells in  
27 a cohort of African individuals with human immunodeficiency virus type 1 (HIV-1)/HCMV co-  
28 infection. A similarly profound influence of dimorphism at position -21 of HLA-B on NK cells was not  
29 evident in these subjects. They predominantly expressed African specific HLA-B and -C alleles that  
30 contribute a distinct supply of NKG2A and KIR ligands, and these genetic differences were  
31 compounded by the marked effect of HIV/HCMV coinfection on NK cell differentiation. Together,  
32 these factors resulted in a lack of correlation of the HLA-B -21 polymorphism with surface abundance  
33 of HLA-E and loss of the NK cell functional advantage in subjects with -21M HLA-B alleles. Instead our  
34 data suggest that during HIV/HCMV co-infection exposure of NK cells to an environment that displays  
35 altered HLA-E ligands drives adaptive NKG2C+ NK cell expansions influencing effector responses.  
36 Increased efforts to understand how NK cells are functionally calibrated to self-HLA during chronic  
37 viral infections will pave the way to developing targeted therapeutic interventions to overcome the  
38 current barriers to enhancing immune-based antiviral control.

## 39 40 Introduction

41 There is a pressing need to better characterize and harness the immune response in order to  
42 develop efficacious immune-based strategies to supplement current therapeutic approaches for a  
43 'functional' cure in chronic viral infections. Natural Killer (NK) cells have the potential to respond to  
44 viruses as direct effectors and can edit adaptive immunity influencing the outcome of viral infections  
45 (1). More recently their capacity to develop adaptive or memory-like features in the setting of  
46 infection has been highlighted (2). A number of studies, both epidemiological and functional, have  
47 provided evidence for the important role of NK cells in human immunodeficiency virus type 1 (HIV-1)  
48 viral control and protection from acquiring new infection (3).

49 In order for NK cells to gain functional competence they are required to be ‘licensed’ or educated, a  
50 process that refines their levels of responsiveness (4). Traditionally this was ascribed to the presence  
51 of inhibitory killer immunoglobulin-like receptor (KIR) – human leukocyte antigen (HLA) class I pairs.  
52 However, recent evidence suggests that NK cells can be educated through the older and more  
53 conserved inhibitory receptor CD94/NKG2A, which recognizes HLA-E complexed with a peptide  
54 derived from the leader sequence of HLA-A, B or C alleles as well as HLA-G (5). HLA-E has little  
55 polymorphism and its levels of expression are influenced by peptide ligand availability. Whereas HLA-  
56 A and HLA-C allotypes are fixed for Methionine (-21M), HLA-B contains a polymorphism that can  
57 encode either Methionine (-21M), which gives rise to functional HLA-E binding peptides, or  
58 Threonine (-21T) at this position, which does not bind effectively to HLA-E. The resultant HLA-B -  
59 21M/T variation defines different sets of haplotypes with -21M biasing toward NKG2A NK cell  
60 education, which has been shown to be associated with superior NK function in healthy HCMV  
61 seronegative adults, and -21T promoting KIR mediated education (6). The reported linkage  
62 disequilibrium (LD) in Eurasian populations between HLA-B -21M and HLA-B Bw6/HLA-C1, which  
63 interact poorly with KIRs, further decreases their potential to mediate NK cell education through KIR  
64 engagement. In contrast, -21T HLA-B haplotypes in various combinations with Bw4, C1 and C2  
65 enhance education via KIRs. Interestingly haplotypes combining HLA-C2 and -21M HLA-B are more  
66 frequently found in Africa in combination with HLA-C allotypes that promote HLA-E expression poorly  
67 (7). The dimorphism at position -21 of HLA-B (M/M genotype) has been associated with increased  
68 susceptibility to HIV-1 infection (8). Notably, the dimorphism influences NK cell cytolysis of HIV-  
69 infected CD4 T cells and macrophages *in vitro*, with -21T enhancing cytolysis compared to -21M,  
70 suggesting that the more educated NKG2A+ NK cells of M/M donors may be less effective in  
71 responding to HIV-1 (9). In light of this, the beneficial effects of Bw4+ HLA-B homozygosity in  
72 controlling HIV-1 viraemia could be re-interpreted in terms of a mechanism involving recognition of  
73 HLA-E by NKG2A+ NK cells of T/T donors (10). Recently HLA-B haplotypes that favour education via  
74 NKG2A were also found to exacerbate the detrimental effect of high HLA-A on HIV-1 control through  
75 impaired killing of HIV infected target cells (11). However, this effect of HLA-A expression on HIV-1  
76 viraemia was less pronounced in individuals of African descent, possibly reflecting the distinct  
77 frequencies of HLA haplotypes present in these populations (11).

78  
79 To date, the phenotypic and functional effects of HLA-B -21 dimorphism on NK cells have not been  
80 assessed in the context of HCMV seropositive individuals or in HIV infected cohorts, where HCMV co-  
81 infection is almost universal (12). We have recently demonstrated the potent effect of HCMV co-  
82 infection in shaping the NK cell repertoire during chronic HIV-1 infection, leading to an accelerated  
83 differentiation and adaptive reconfiguration of the NK cell compartment and expansion of an NK cell  
84 subset expressing NKG2C, the activating counterpart of NKG2A that also binds to HLA-E (recognizing  
85 HLA-E bound to HLA class Ia signal sequence peptides with lower affinity than NKG2A) (13) (14) (15).  
86 The relevance of HLA-E/NKG2C interactions has been well demonstrated in driving adaptive NK cell  
87 expansions and more recently a highly specific recognition of certain HCMV-encoded HLA-E  
88 presented peptides was elegantly shown (16) (17). A rare UL40 peptide, identical to the HLA-E-  
89 binding peptide in the HLA-G signal sequence, was found to trigger optimal NK stimulation and to  
90 have functional consequences, influencing NK cell antibody dependent cellular cytotoxicity (ADCC)  
91 responses (17).

92 It remains unclear how the presence of this polymorphism and changes in the HLA-E ligandome  
93 during infection and inflammation affect NK cell phenotypic and functional diversity in heterogenous  
94 populations with HIV-1 infection and high levels of HCMV co-infection. To further explore this, in the  
95 current study we investigated whether the HLA-B -21 dimorphism leads to a NK cell functional  
96 dichotomy in an African cohort co-infected with HIV/HCMV.

## 97 **Materials and methods**

## 98 **Study Subjects**

99 Cross-sectional analysis was performed on peripheral blood mononuclear cells (PBMCs)  
100 cryopreserved from chronically HIV-1 infected HCMV seropositive females recruited into the Centre  
101 for HIV/AIDS Vaccine Immunology (CHAVI)001 study at clinical sites in Africa. The CHAVI001 study  
102 was approved by the Duke Medicine and National Institutes of Health Institutional Review Boards as  
103 well as the ethics boards of the local sites. All study participants gave written informed consent and  
104 were hepatitis C virus antibody negative and hepatitis B surface antigen (HBsAg) antibody negative.  
105 Human cytomegalovirus (HCMV) infection status was determined by HCMV IgG enzyme-linked  
106 immunosorbent assay (ELISA) (BioKit) on stored plasma samples. HLA class I genotyping of the study  
107 donors to 2-digit allele resolution was performed by ProImmune (Oxford, UK) by PCR analysis of DNA  
108 extracted from donor PBMC. HLA-A expression model estimates (z-score) were inferred as  
109 previously described (11). The subject characteristics, HLA class I genotypes and distribution of HLA-  
110 B -21M and -21T among HLA-B groups are summarised in **Suppl. Table 1**.

## 111 **Monoclonal Antibodies and Flow Cytometry analysis**

112 For flow cytometric analysis, cryopreserved PBMC were thawed, washed in phosphate-buffered  
113 saline (PBS), and surface stained at 4°C for 20 min with saturating concentrations of different  
114 combinations of the following antibodies in the presence of fixable live/dead stain (Invitrogen):  
115 CD14 BV510, CD19 BV510, CD56 PE Dazzle, CD3 BV650, CD16 PERCP or CD16 BV711, HLA-E PE  
116 (3D12) (Biolegend), CD4-eFluor 780, CD8 Alexa700 (eBioscience), HLA-C PE (DT-9) (BD Biosciences),  
117 NKG2A Pe-Cy7, KIR2DL2 APC CD158b1/b2.j APC (Beckman Coulter), NKG2C PE or NKG2C Alexa 700,  
118 KIR2DL1/2DS5 APC IgG1 [CD158a], KIR3DL2 APC (R&D systems), CD57 BV421 or CD57 FITC (BD  
119 Biosciences), KIR3DL1 APC [CD158e1] (Miltenyi). For the detection of intracellular antigens cells  
120 were fixed, permeabilized and stained for IFN- $\gamma$  BV421 (BD Biosciences) and Fc $\epsilon$ R1- $\gamma$ -FITC (Millipore).  
121 The antibody against PLZF CF594 (BD Biosciences) was used for intranuclear antigen detection  
122 utilising the Foxp3 intranuclear staining buffer kit (eBioscience) according to the manufacturer's  
123 instructions. Samples were acquired on a BD Fortessa X20 using BD FACSDiva8.0 (BD Bioscience).  
124 Data were analyzed using FlowJo 10 (TreeStar) and stochastic neighbour embedding (SNE) analysis  
125 was performed using the mrc.cytobank platform. The FCS file concatenation tool was used for  
126 concatenating multiple FCS files into a single FCS file prior to uploading the files to cytoBank.

## 127 **Functional ADCC assay**

128 For analysis of NK cell mediated ADCC responses, RAJI cells (1-2x10<sup>6</sup> cells/mL) were coated with  
129 anti-CD20 or murine immunoglobulin G (IgG) (InvivoGen) at 2.5  $\mu$ g/ml for 30 min. Subsequently RAJI  
130 cells were washed and then mixed with PBMCs in a V bottom 96-well plate at a 10:1 ratio and  
131 incubated for 6 hours 37°C in the presence of CD107a-APC-Cy7 antibody (BD Biosciences, Cowley,  
132 U.K.). GolgiStop (containing Monensin, 1/1500 concentration, BD Biosciences) and GolgiPlug  
133 (containing brefeldin A, 1/1000 final concentration, BD Biosciences) were added for the last 5 hours  
134 of culture. Following incubation cells were washed and stained for extracellular receptors prior to  
135 permeabilization and intracellular staining for IFN- $\gamma$ . Boolean gating analysis was used to analyse  
136 CD107a and IFN- $\gamma$  production in CD56<sup>dim</sup> NK cell subpopulations expressing CD57, NKG2A and KIRs  
137 and combinations thereof.

138

## 139 **Soluble HLA-G measurement**

140 Soluble HLA-G1/G5 was measured in plasma by ELISA using a BioVendor-EXBIO kit according to the  
141 manufacturer's instructions.

## 142 **Data analysis**

143 Prism 7 (GraphPad Software) was used for all statistical analysis as follows: the Mann-Whitney U-  
144 test or Student's t test were used for single comparisons of independent groups, the Wilcoxon-test  
145 was used to compare two paired groups and the Kruskal-Wallis with Dunn's multiple comparison

146 test was used to compare three unpaired sample groups. The nonparametric Spearman test was  
147 used for correlation analysis. SPICE analysis was performed in SPICE version 6. \*p-value $\leq$ 0.05, \*\*p-  
148 value $\leq$ 0.01, \*\*\*p-value $\leq$ 0.001, \*\*\*\*p-value $\leq$ 0.0001.

## 149 Results

### 150 Haplotypes combining HLA-C2 and -21M HLA-B are common in African populations and the HLA-B 151 -21M dimorphism does not significantly impact on surface HLA-E expression

152 To explore the effects of the HLA-B dimorphism in a non-Caucasian population, we initially analyzed  
153 HLA haplotypes and examined the segregation of HLA-C allotypes and -21 HLA-B alleles in a cohort of  
154 viraemic age-matched HIV-1 infected HCMV-seropositive African females, representing the three key  
155 -21 HLA-B genotypes: -21M/M homozygotes, -21M/T heterozygotes and -21T/T homozygotes  
156 (Fig. 1A). There were no significant differences in the HIV-1 viral load levels between the three  
157 groups (Suppl. Table 1). In contrast to Eurasian populations, which have an effective exclusion of -  
158 21M HLA-B from haplotypes encoding HLA-C2, this segregation was not evident in this cohort (Fig.  
159 1A), in keeping with the presence of African specific alleles, B\*42:01-C\*17:01 and B\*81:01-C\*18:01  
160 in the M/M group (Suppl. Table 1.). Such haplotypes combining HLA-C2 with -21M HLA-B provide  
161 both a C2 allele, a stronger KIR ligand than C1, and an HLA-E ligand for NKG2A. HLA-B -21M alleles  
162 did not encode HLA-B Bw4 in our cohort, in line with data derived from larger population analysis (6)  
163 but interestingly, a high proportion of the subjects with -21T HLA-B alleles (9 out of 13 subjects) also  
164 did not encode HLA-B Bw4, which functions as a KIR ligand (Suppl. Table 1). The subsets of HLA  
165 haplotypes in the study groups defined by the presence of -21M HLA-B in various combination with  
166 HLA-C1 and C2 could therefore result in the availability of KIR ligands differentially supplying HLA-E-  
167 binding peptides to form NKG2A ligands being distinct from that in Caucasian populations, with  
168 consequences for NK cell education.

169 To investigate the effects of the HLA-B -21 dimorphism on surface expression of HLA-E we examined  
170 the expression of HLA-E on peripheral blood mononuclear cells (PBMCs) in subject groups  
171 distinguished on the basis of the amino acid encoded (M/M, M/T and T/T). Despite median levels of  
172 total cellular HLA-E expression on PBMCs being higher in M/M individuals, no significant difference  
173 was observed in surface HLA-E expression on PBMC between the groups (Fig. 1B). Moreover, no  
174 correlation was detected between -21M copy number and the proportion of NK cells expressing  
175 either NKG2A (Fig. 1C) or its activating counterpart NKG2C (Fig. 1D). These observations contrast  
176 findings in HCMV seronegative Eurasian individuals where HLA haplotypes defined by -21M HLA-B  
177 were associated with increased surface expression of HLA-E and a decreased frequency of NK cells  
178 expressing NKG2A (6).

179 Furthermore, no relationship was detected between the surface levels of HLA-E expression and HLA-  
180 A imputed expression level (z score) in subject groups distinguished on the basis of the presence of  
181 HLA-B -21M in this cohort (Suppl. Fig. 1A). The effect of HLA-A expression on HIV-1 viraemia was  
182 also not evident in individuals with HLA-B -21M/M, in keeping with a reported less prominent effect  
183 in Africans/African-Americans relative to Caucasians, conceivably as a consequence of the distinct  
184 HLA haplotypes and frequencies present in individuals of African descent (Suppl. Fig. 1B) (Ramsuran  
185 et al 2018).

186

### 187 Surface abundance of HLA-C does not correlate with -21 HLA-B

188 The amount of cell-surface HLA-C expression has been previously reported to vary with -21 HLA-B  
189 type, with M/M HCMV seronegative European donors displaying low levels, as a result of their  
190 relatively restricted HLA-C diversity and genotypes dominated by HLA-C\*07, which is subject to  
191 microRNA-148a (miR-148a) mediated downregulation (18). Whilst in predominantly Eurasian  
192 populations haplotypes combining -21M HLA-B and C2 are rare, the African haplotypes present in  
193 the M/M group combine specific HLA-B and C2 alleles i.e. B\*42:01-C\*17:01 and B\*81:01 – C\*18:01.  
194 Despite some variation in the levels of surface expression of HLA-C (assessed by staining with the

195 HLA-C and HLA-E-reactive antibody DT9) (19), especially in T/T donors, there was no overall  
196 difference in the mean levels of expression between the study groups and there was no correlation  
197 between cell surface abundance of HLA-C and -21 HLA-B genotype (Fig. 2A). Equally we observed no  
198 obvious clustering according to HLA-C1 and C2 types and only a single M/T donor was homozygous  
199 for HLA-C\*07, an allele that is highly represented in M/M individuals of European origin as  
200 previously shown (Fig. 2B, C) (6).

### 201 KIR education and differentiation predominate in HIV/HCMV seropositive subjects of African 202 descent irrespective of -21 HLA-B dimorphism

203 The effect of viraemic HIV-1 infection on driving alterations in the NK cell subset distribution is well  
204 described (20) (15). In keeping with this we confirmed the presence of the aberrant CD56<sup>neg</sup>CD16+  
205 NK cell subset in our cohort; however, no significant differences in the frequencies of the CD56<sup>bright</sup>,  
206 CD56<sup>dim</sup> and CD56<sup>neg</sup> NK cell subsets were observed between groups of M/M, M/T and T/T  
207 individuals (Suppl Fig. 2 A, B, C). Notably chronic HIV/HCMV co-infection also leads to an  
208 accentuated differentiation within the CD56<sup>dim</sup> subset with the emergence of a  
209 CD57+NKG2C+KIR+NKG2A- signature and expansion of adaptive NK cell subsets (15) (21) (22). We  
210 therefore investigated the phenotypic diversity of CD56<sup>dim</sup> NK cell subset to delineate the fingerprint  
211 of HCMV co-infection in the three study groups in relation to the presence of -21 HLA-B dimorphism.  
212 In the cohort as a whole, the acquisition of inhibitory KIRs on CD56<sup>dim</sup> NK cells was paralleled by a  
213 loss of NKG2A expression ( $r=-0.4165$ ,  $p=0.0143$ ) (23). A tight positive correlation between NKG2C  
214 and KIR expression was further noted, in line with expansion of self-specific KIRs in the context of  
215 HCMV infection/re-activation ( $r=0.5960$ ,  $p=0.0002$ ) (24) (25) (26). The level of expression of KIRs  
216 (cocktail of antibodies against KIR2DL1/S5, KIR2DL2/L3/S2, KIR3DL2, and KIR3DL1) on CD56<sup>dim</sup> NK  
217 cells did not differ between the three study groups (Fig. 3A, B). Levels of CD57 expression were also  
218 comparable between the three groups, suggesting the presence of NK cells at different  
219 differentiation stages (Fig. 3A, B). Examination of additional markers such as the key signalling  
220 molecule FcεRI-γ and the transcription factor promyelocytic leukemia zinc (PLZF), the absence of  
221 which characterises adaptive NK cell subsets, showed a broader range of expression with a trend for  
222 a lower median level of expression in T/T subjects, which did not reach statistical significance (Fig.  
223 3A, B).

224 Boolean gating analysis was performed next to examine the proportion of NKG2A or KIR-educated  
225 CD56<sup>dim</sup> NK cells that were more highly differentiated (assessed on the basis of expression of CD57)  
226 (Fig 3C). The proportion of KIR-NKG2A+ CD56<sup>dim</sup> NK cells, educated via the inhibitory NKG2A  
227 receptor, was  $21.95\% \pm 4.432$  (mean  $\pm$  SEM) in M/M,  $29.09\% \pm 5.315$  in M/T and  $26.26\% \pm 5.432$   
228 in T/T donors. The extent to which these NKG2A-educated cells were differentiated (according to the  
229 expression of CD57) did not vary with the -21M copy number and represented a small fraction  
230 ( $10.65\% \pm 2.440$ , mean  $\pm$  SEM in M/M donors,  $12.89\% \pm 3.262$  in M/T and  $14.12\% \pm 3.508$  in T/T  
231 donors). KIR+NKG2A- NK cells, which can only be educated via KIRs, represented a larger fraction of  
232 CD56<sup>dim</sup> NK cells in all groups ( $45.83\% \pm 6.159$ ,  $36.57\% \pm 6.847$  and  $49.48\% \pm 5.767$ , in M/M, M/T and  
233 T/T subjects respectively). The proportion of KIR-educated NK cells that were differentiated (CD57+)  
234 was higher than that observed in the NKG2A-educated fraction, comprising in M/M donors  $40.43\% \pm 5.204$   
235 in M/M donors and  $40.82 \pm 5.339$  in T/T donors, and trending to be somewhat lower in M/T  
236 subjects ( $28.59 \pm 5.629$ ) (Fig. 3C). These results are in keeping with loss of NKG2A expression with  
237 increasing NK cell differentiation in HIV infection and contrast findings of a dominant effect of the -  
238 21M HLA-B dimorphism on increasing the differentiated subpopulation of the educated KIR-NKG2A+  
239 NK cells in Caucasian HCMV seronegative donors (6).

240 Whereas all donors exhibited comparable levels of CD57 expression on CD56<sup>dim</sup> NK cells, the  
241 activating receptor CD16 was expressed by a higher proportion of differentiated CD57+ CD56<sup>dim</sup> NK  
242 cells in T/T donors compared to M/M and M/T donors ( $p=0.02$  and  $p=0.01$  respectively) (Fig. 3D). As  
243 expected the CD57+ subset of NK cells in all groups was enriched for additional adaptive features  
244 such as lower levels of PLZF and FcεRI-γ and enriched for KIR and NKG2C compared to the CD57

245 negative fraction of NK cells, as previously described (15). In T/T donors the CD57+ NK cell subset  
246 trended to have higher mean levels of expression of NKG2C and lower mean levels of expression of  
247 PLZF and FcεRI-γ compared to the CD57+ NK cells in M/M and M/T donors although this did not  
248 reach statistical significance (**Suppl. Fig 3**).

249

#### 250 **The dominant effect of -21M on NK cell function is lost in HIV/HCMV donors**

251 To further examine the influence of -21 HLA B dimorphism on NK cell education and associated NK  
252 cell function we utilised an antibody-coated target cell stimulation assay to measure ADCC.  
253 Following stimulation with Raji cells coated with anti-CD20, CD56<sup>dim</sup> NK cells were assessed for  
254 cytokine production by intracellular cytokine staining and degranulation, as measured by surface  
255 expression of CD107a. NK cells from T/T donors demonstrated a trend towards higher production of  
256 IFN-γ relative to those from M/M donors and higher IFN-γ production compared to M/T individuals  
257 (**Fig. 4A**). A similar trend towards higher NK cell expression of CD107a was observed in T/T donors in  
258 relation to the M/M and M/T groups (**Fig. 4B**). For both functional responses a range of IFN-γ  
259 production and CD107a expression was observed within each group that could not be attributed to  
260 their HLA-C haplotype (data not shown). Further analysis of the proportion of IFN-γ producing  
261 CD56<sup>dim</sup> NK cells that were differentiated (according to CD57 expression) and either educated via  
262 NKG2A or KIRs, showed a higher proportion of the cytokine producing cells being comprised of  
263 CD57+NKG2A-KIR+ NK cells than CD57+NKG2A-KIR- cells in M/M and T/T donors ( $p=0.006$  and  
264  $p=0.005$  respectively) but this did not reach statistical significance for the M/T group. These  
265 differences are reflected in all three pie charts (**Fig. 4C**), where the subset of IFN-γ-producing cells  
266 with a CD57+NKG2A-KIR+ phenotype is of similar size in M/M, T/T and slightly smaller in M/T  
267 donors, in keeping with lower frequencies of differentiated KIR educated NK cells in this group.  
268 These data suggest the dominant effect of KIR mediated education for IFN-γ producing NK cells  
269 irrespective of -21 HLA-B dimorphism. A similar effect was observed for CD107a production in M/M  
270 and T/T subjects whereas in M/T donors the effects of the educating KIRs are less distinct (data not  
271 shown).

272 In addition to the effect of education, the variability in the ADCC functional responses of CD56<sup>dim</sup>  
273 NK cells, in particular IFN-γ production, could relate to cellular expression of CD16. *Ex vivo* the  
274 proportion of NK cells expressing CD16 correlated with IFN-γ production ( $r=0.5609$   $p=0.0007$ ),  
275 suggesting that shedding of CD16 reported in progressive HIV-1 infection, could contribute to the  
276 reduction of NK cell ADCC function in our study cohort (**Fig. 4D**) (27). Notably adaptive NKG2C+ NK  
277 cell subpopulations that arise in response to HCMV infection and expand during HIV-1 infection are  
278 imbued with enhanced ADCC capacity, in particular production of IFN-γ following CD16 ligation,  
279 reflecting epigenetic modifications and enhanced downstream signalling through CD3z homodimers  
280 in the absence of FcεRI-γ (15) (28). We therefore assessed whether the size of adaptive NKG2C+ NK  
281 cell populations could account for the variability in IFN-γ production noted between and within the  
282 three study groups. In the cohort as a whole, IFN-γ production correlated strongly ( $r=0.5616$ ,  
283  $p=0.0007$ ) with NKG2C expression, suggesting that the presence of adaptive subpopulations,  
284 enriched within differentiated CD57+ and KIR+ NK cells (which also correlate with IFN-γ production),  
285 could modulate NK cell functional capacity to antibody coated targets (**Fig. 4D**).

286 Recently it was demonstrated that HCMV-derived peptides presented by HLA-E, in particular the  
287 rare UL40 peptide VMAPRTLFL which is identical to the HLA-G leader peptide, fine tune the ADCC  
288 response of NK cells via NKG2C recognition (17). Both membrane bound and soluble levels of HLA-G  
289 are reported to be increased in untreated HIV infection and during HCMV infection and have been  
290 shown to correlate with blood IFN-γ concentrations and could therefore represent a source of HLA-E  
291 peptides in T/T individuals (29) (30) (31). Although we did not detect any significant differences in  
292 the soluble plasma HLA-G concentration between the study groups, HLA-G levels showed a weak  
293 association with IFN-γ production suggesting that an environment potentially displaying altered HLA-  
294 E peptide ligands recognised by adaptive NKG2C expressing NK cells may induce differential cellular  
295 responses (**Fig. 4D**).

296

297 **Discussion**

298 HLA-E acts as powerful modulator of the immune response, serving as a ligand for NKG2 receptors  
299 that provide a functionally complementary axis to the polymorphic KIR system for control of innate  
300 lymphocyte subsets. HLA-E binds signal peptides derived from the leader sequence of HLA-A, B, C  
301 and G proteins in order to achieve stable expression at the cell surface (32). -21M, the residue  
302 present in all HLA-A and -C and a minority of -B allotypes, facilitates folding and expression of HLA-E  
303 by providing a strong anchor residue in contrast to -21T, the residue present in the majority of HLA-B  
304 allotypes. Whereas this genetic segregation depending on HLA-B dimorphism leads to a binary form  
305 of NK cell education and functional responsiveness in HCMV seronegative donors of European origin  
306 by either supplying NKG2A or KIR ligands (6), our findings indicate that this is not a generic principle  
307 that applies to ethnically diverse cohorts with HIV/HCMV co-infection. The presence of African  
308 specific alleles, together with alterations in the HLA-E peptide repertoire due to the availability of  
309 peptides derived from other cellular and viral sources that could arise during HIV/HCMV coinfection,  
310 trigger the expansion of adaptive NK cells expressing the activating receptor NKG2C with subsequent  
311 functional consequences. The lack of -21M expression could thus become redundant in HCMV  
312 seropositive individuals where UL40 or HLA-G derived peptides may stabilise the expression of HLA-E  
313 and fine tune NK cell activation and antibody driven adaptive responses.

314 In Eurasian populations the reported LD between HLA-B -21M and HLA-B Bw6/HLA-C1 limits the  
315 supply of KIR ligands and favours NKG2A mediated NK cell education (6). However, the genetic  
316 segregation between HLA-C1 and -21M HLA-B was not evident in this study group, where the  
317 presence of HLA-C2, a stronger KIR ligand than C1, resulted in the presence of both KIR and HLA-E  
318 ligands for NKG2 receptors in M/M donors. In addition, the more common African haplotypes  
319 combining -21M and HLA-C2 involve African specific HLA-C allotypes that have leader sequences that  
320 poorly promote HLA-E expression, further limiting the supply of HLA-E ligands for interaction with  
321 NKG2 receptors on NK cells. These genetic effects could partly explain the lack of association  
322 between -21M copy number and surface HLA-E expression in our cohort. Another possible genetic  
323 factor that may have influenced the levels of HLA-E expression in our cohort is the dimorphism at  
324 position 107 of HLA-E, which distinguishes two most common alleles, HLA-E\*01:01 (position 107  
325 arginine, R) and HLA-E\*01:03 (position 107 glycine, G), the former of which is reported to be  
326 expressed at lower levels than the latter (33) although this has not been seen in all studies (9).  
327 Nonetheless, although HLA-E genotyping was not performed in our cohort, as the two main HLA-E  
328 alleles occur in roughly equal frequencies in different ethnic groups and are maintained in diverse  
329 HLA haplotypes by stabilizing selection (34), allele frequencies would not have been expected to  
330 differ significantly between our study groups.

331 In addition to genetic differences between our cohort and those studied previously, the presence of  
332 chronic HIV-1 and HCMV co-infection in our study subjects may also have contributed to the lack of  
333 significant difference in surface HLA-E expression between study groups. HLA-E surface levels serve  
334 as an important sensor of HLA class I expression and are sensitive to perturbations in the  
335 biosynthesis of most polymorphic class I allotypes as well as the class Ib molecule HLA-G imparted by  
336 viral infections or stress. Of note whilst HIV-1 Nef causes down-regulation of HLA-A, B and Vpu  
337 mediates reduction of HLA-C, these viral accessory proteins mediate their effects post-translationally  
338 and should not affect the supply of HLA class I signal peptides; and HCMV maintains/stabilizes HLA-E  
339 expression (35) (36) (37, 38). However, the presence of specific HCMV UL40 variants and/or HLA-G  
340 levels may be altering the supply of HLA-E binding peptides in our cohort.

341 As well as observing no impact of the HLA-B -21 dimorphism on the level of expression of HLA-E we  
342 also did not detect a correlation between -21M copy number and NKG2A expression in our cohort.  
343 During NK cell development and education, the acquisition of self-reactive KIRs leads to progressive

344 downregulation and decreased surface expression of NKG2A (23). This process is accelerated during  
345 HIV infection/HCMV coinfection and further underlined by the expansion of differentiated CD57+  
346 NKG2C+ NK cell subsets enriched for KIRs for self HLA-C1 and/or C2 allotypes, which explains the  
347 lack of correlation between -21M HLA-B and better NKG2A+KIR- educated NK cells in this cohort.  
348 Due to limitations in sample availability we were not able to type the KIR genes nor perform staining  
349 for individual KIRs in our study subjects. Specific KIR alleles are reported to differ in their strength of  
350 signalling, with associated effects on NK cell education/ADCC responses, which could further explain  
351 some of the inter-donor variability observed in this study. A recent study has further highlighted the  
352 critical role of KIR polymorphism influencing responses to HCMV, where in particular the interaction  
353 between KIR2DL1 and HLA-C2 ligands drives large and stable expansions of adaptive NKG2C+ NK  
354 cells (26). It would therefore be of interest to determine the effect of KIR polymorphism in  
355 modulating the size of the adaptive NK cell pool in larger HIV-1/HCMV coinfecting cohorts.

356 There is increased appreciation that peptides presented via HLA-E during conditions of stress and  
357 viral infections influence the activation of NK cells, driving expansion of adaptive NKG2C+ NK cells  
358 and subsequent enhancement of ADCC responses. In keeping with this, we observed a range of  
359 ADCC responses in our cohort that correlated with NKG2C expression. Furthermore, UL40 in HCMV  
360 encodes peptides that mimic MHC class I signal sequences and share a conserved methionine (M)  
361 anchor residue at peptide amino-acid residue 2), which correspond to amino acid -21 of the classical  
362 HLA class I leader sequence (16) (17). Hence HCMV infection provides peptides that may substitute  
363 for host HLA-I-derived HLA-E stabilising nonameric peptides in T/T donors. Interestingly UL40  
364 polymorphisms and the strength of interactions between HLA-E presented peptide and NKG2C  
365 controls the activation of adaptive NK cells. Of note, a gradient in NKG2C+ NK cell effector function  
366 has been reported depending on the potency of recognition of HCMV peptides (VMAPRTLFL >  
367 VMAPRTLIL > VMAPRTLVL) (17). The VMAPRTLFL UL40 derived peptide mimics the signal peptide of  
368 HLA-G, the expression of which is upregulated during inflammation, HCMV infection and HIV-1  
369 infection, and specifically enhances antibody-driven adaptive NK cell responses as recently described  
370 (17). Regardless of the peptide source, it is tempting to speculate that alterations in the HLA-E  
371 ligandome surveyed by the NKG2C receptor contribute differentially to the accumulation,  
372 differentiation and effector functions of adaptive NKG2C+ NK cells during infection. Whether HIV-1  
373 peptides could further exploit the HLA-E/NKG2 axis as recently suggested (39) requires further  
374 evaluation.

375 The role of adaptive NK cells in influencing the rate of HIV acquisition and levels of viral control  
376 during established infection remains poorly defined, but offers an alternative explanation for  
377 previous epidemiological observations, that needs to be formally addressed with a combination of  
378 population and functional studies. Assessment of the overall impact of HLA-B dimorphism on the  
379 acquisition of or control of HIV-1 infection will need to take into account a number of effects in  
380 addition to the contribution of HLA/peptide complex availability and its impact on the NKG2  
381 pathway. These include effects on CD8 T cell responses and interactions between the Bw4/Bw6  
382 epitope and the KIR3DL1/3DS1 pathway, which will necessitate study of much larger cohorts.

383 In summary, we posit that in addition to differences in the genetic background, chronic HIV-1  
384 infection with frequent reactivations of HCMV affects the pool of peptides presented by HLA-E and  
385 surface levels of HLA-E providing a more diverse range of ligands for CD94/NKG2 NK cells. The  
386 strength of these interactions and presence of inflammatory stimuli shape the NK cell pool and  
387 functional activity, blurring the dichotomous effect of -21 HLA-B on NK cell function seen in Eurasian  
388 HCMV seronegative donors. Future larger studies aimed at dissecting the effect of different HLA-  
389 E/peptide ligands on adaptive NK cells in relation to -21 HLA-B polymorphism, during disease are  
390 required, in order to facilitate realisation of the translational potential of specific NK cell  
391 subpopulations and exploit the NKG2C/HLA-E axis to enhance NK cell functionality.



392

393 **Author Contributions**

394 EMC performed experiments, contributed to study design, acquisition of data, analysis, and drafting  
395 of the manuscript; AO performed experiments and contributed to acquisition of data; PB  
396 contributed to study design, data interpretation and critical editing of the manuscript. DP:  
397 conception and design of study, data analysis and interpretation, critical revision of the manuscript  
398 and study supervision.

399

400 **Conflict of Interest**

401 The authors declare that the research was conducted in the absence of any commercial or financial  
402 relationships that could be construed as a potential conflict of interest.

403

404 **Funding**

405 This work was supported by MRC grants MR/M008614 (DP) and MR/K012037 (PB), an AOP grant  
406 awarded to DP and NIH, NIAID, DAIDS UM1 grants AI67854 (CHAVI), AI00645 (Duke CHAVI-ID) and  
407 AI144371 (BFH, PB) and R56 award AI147778 (PB, DP). PB is a Jenner Institute Investigator.

408

409 **References**

410

- 411 1. Waggoner SN, Reighard SD, Gyurova IE, Cranert SA, Mahl SE, Karmele EP, et al. Roles  
412 of natural killer cells in antiviral immunity. *Current opinion in virology*. 2016;16:15-23.
- 413 2. O'Sullivan TE, Sun JC, Lanier LL. Natural Killer Cell Memory. *Immunity*.  
414 2015;43(4):634-45.
- 415 3. Scully E, Alter G. NK Cells in HIV Disease. *Current HIV/AIDS reports*. 2016;13(2):85-  
416 94.
- 417 4. Boudreau JE, Hsu KC. Natural killer cell education in human health and disease.  
418 *Current opinion in immunology*. 2018;50:102-11.
- 419 5. Braud VM, Allan DS, O'Callaghan CA, Soderstrom K, D'Andrea A, Ogg GS, et al. HLA-E  
420 binds to natural killer cell receptors CD94/NKG2A, B and C. *Nature*. 1998;391(6669):795-9.
- 421 6. Horowitz A, Djaoud Z, Nemat-Gorgani N, Blokhuis J, Hilton HG, Beziat V, et al. Class I  
422 HLA haplotypes form two schools that educate NK cells in different ways. *Science*  
423 *immunology*. 2016;1(3).
- 424 7. Vales-Gomez M, Reyburn HT, Erskine RA, Lopez-Botet M, Strominger JL. Kinetics and  
425 peptide dependency of the binding of the inhibitory NK receptor CD94/NKG2-A and the  
426 activating receptor CD94/NKG2-C to HLA-E. *EMBO J*. 1999;18(15):4250-60.
- 427 8. Merino AM, Song W, He D, Mulenga J, Allen S, Hunter E, et al. HLA-B signal peptide  
428 polymorphism influences the rate of HIV-1 acquisition but not viral load. *The Journal of*  
429 *infectious diseases*. 2012;205(12):1797-805.
- 430 9. Merino AM, Sabbaj S, Easlick J, Goepfert P, Kaslow RA, Tang J. Dimorphic HLA-B  
431 signal peptides differentially influence HLA-E- and natural killer cell-mediated cytotoxicity of  
432 HIV-1-infected target cells. *Clinical and experimental immunology*. 2013;174(3):414-23.
- 433 10. Flores-Villanueva PO, Yunis EJ, Delgado JC, Vittinghoff E, Buchbinder S, Leung JY, et  
434 al. Control of HIV-1 viremia and protection from AIDS are associated with HLA-Bw4  
435 homozygosity. *Proceedings of the National Academy of Sciences of the United States of*  
436 *America*. 2001;98(9):5140-5.
- 437 11. Ramsuran V, Naranbhai V, Horowitz A, Qi Y, Martin MP, Yuki Y, et al. Elevated HLA-A  
438 expression impairs HIV control through inhibition of NKG2A-expressing cells. *Science*.  
439 2018;359(6371):86-90.

- 440 12. Gianella S, Massanella M, Wertheim JO, Smith DM. The Sordid Affair Between  
441 Human Herpesvirus and HIV. *The Journal of infectious diseases*. 2015;212(6):845-52.
- 442 13. Guma M, Budt M, Saez A, Brckalo T, Hengel H, Angulo A, et al. Expansion of  
443 CD94/NKG2C+ NK cells in response to human cytomegalovirus-infected fibroblasts. *Blood*.  
444 2006;107(9):3624-31.
- 445 14. Beziat V, Liu LL, Malmberg JA, Ivarsson MA, Sohlberg E, Bjorklund AT, et al. NK cell  
446 responses to cytomegalovirus infection lead to stable imprints in the human KIR repertoire  
447 and involve activating KIRs. *Blood*. 2013;121(14):2678-88.
- 448 15. Peppas D, Pedroza-Pacheco I, Pellegrino P, Williams I, Maini MK, Borrow P. Adaptive  
449 Reconfiguration of Natural Killer Cells in HIV-1 Infection. *Frontiers in immunology*.  
450 2018;9:474.
- 451 16. Hammer Q, Ruckert T, Borst EM, Dunst J, Haubner A, Durek P, et al. Peptide-specific  
452 recognition of human cytomegalovirus strains controls adaptive natural killer cells. *Nature*  
453 *immunology*. 2018;19(5):453-63.
- 454 17. Rolle A, Meyer M, Calderazzo S, Jager D, Momburg F. Distinct HLA-E Peptide  
455 Complexes Modify Antibody-Driven Effector Functions of Adaptive NK Cells. *Cell reports*.  
456 2018;24(8):1967-76 e4.
- 457 18. Kulkarni S, Savan R, Qi Y, Gao X, Yuki Y, Bass SE, et al. Differential microRNA  
458 regulation of HLA-C expression and its association with HIV control. *Nature*.  
459 2011;472(7344):495-8.
- 460 19. Corrah TW, Goonetilleke N, Kopycinski J, Deeks SG, Cohen MS, Borrow P, et al.  
461 Reappraisal of the relationship between the HIV-1-protective single-nucleotide  
462 polymorphism 35 kilobases upstream of the HLA-C gene and surface HLA-C expression.  
463 *Journal of virology*. 2011;85(7):3367-74.
- 464 20. Mavilio D, Lombardo G, Benjamin J, Kim D, Follman D, Marcenaro E, et al.  
465 Characterization of CD56-/CD16+ natural killer (NK) cells: a highly dysfunctional NK subset  
466 expanded in HIV-infected viremic individuals. *Proceedings of the National Academy of*  
467 *Sciences of the United States of America*. 2005;102(8):2886-91.
- 468 21. Guma M, Cabrera C, Erkizia I, Bofill M, Clotet B, Ruiz L, et al. Human cytomegalovirus  
469 infection is associated with increased proportions of NK cells that express the CD94/NKG2C  
470 receptor in aviremic HIV-1-positive patients. *The Journal of infectious diseases*.  
471 2006;194(1):38-41.
- 472 22. Mela CM, Goodier MR. The contribution of cytomegalovirus to changes in NK cell  
473 receptor expression in HIV-1-infected individuals. *The Journal of infectious diseases*.  
474 2007;195(1):158-9; author reply 9-60.
- 475 23. Bjorkstrom NK, Riese P, Heuts F, Andersson S, Fauriat C, Ivarsson MA, et al.  
476 Expression patterns of NKG2A, KIR, and CD57 define a process of CD56dim NK-cell  
477 differentiation uncoupled from NK-cell education. *Blood*. 2010;116(19):3853-64.
- 478 24. Beziat V, Dalgard O, Asselah T, Halfon P, Bedossa P, Boudifa A, et al. CMV drives  
479 clonal expansion of NKG2C+ NK cells expressing self-specific KIRs in chronic hepatitis  
480 patients. *European journal of immunology*. 2012;42(2):447-57.
- 481 25. Djaoud Z, David G, Bressollette C, Willem C, Rettman P, Gagne K, et al. Amplified  
482 NKG2C+ NK cells in cytomegalovirus (CMV) infection preferentially express killer cell Ig-like  
483 receptor 2DL: functional impact in controlling CMV-infected dendritic cells. *J Immunol*.  
484 2013;191(5):2708-16.

- 485 26. Manser AR, Scherenschlich N, Thons C, Hengel H, Timm J, Uhrberg M. KIR  
486 Polymorphism Modulates the Size of the Adaptive NK Cell Pool in Human Cytomegalovirus-  
487 Infected Individuals. *J Immunol.* 2019.
- 488 27. Liu Q, Sun Y, Rihn S, Nolting A, Tsoukas PN, Jost S, et al. Matrix metalloprotease  
489 inhibitors restore impaired NK cell-mediated antibody-dependent cellular cytotoxicity in  
490 human immunodeficiency virus type 1 infection. *Journal of virology.* 2009;83(17):8705-12.
- 491 28. Schlums H, Cichocki F, Tesi B, Theorell J, Beziat V, Holmes TD, et al. Cytomegalovirus  
492 infection drives adaptive epigenetic diversification of NK cells with altered signaling and  
493 effector function. *Immunity.* 2015;42(3):443-56.
- 494 29. Amiot L, Vu N, Samson M. Immunomodulatory properties of HLA-G in infectious  
495 diseases. *Journal of immunology research.* 2014;2014:298569.
- 496 30. Murdaca G, Contini P, Setti M, Cagnati P, Lantieri F, Indiveri F, et al. Behavior of non-  
497 classical soluble HLA class G antigens in human immunodeficiency virus 1-infected patients  
498 before and after HAART: comparison with classical soluble HLA-A, -B, -C antigens and  
499 potential role in immune-reconstitution. *Clin Immunol.* 2009;133(2):238-44.
- 500 31. Yan WH, Lin A, Chen BG, Chen SY. Induction of both membrane-bound and soluble  
501 HLA-G expression in active human cytomegalovirus infection. *The Journal of infectious  
502 diseases.* 2009;200(5):820-6.
- 503 32. Lee N, Goodlett DR, Ishitani A, Marquardt H, Geraghty DE. HLA-E surface expression  
504 depends on binding of TAP-dependent peptides derived from certain HLA class I signal  
505 sequences. *J Immunol.* 1998;160(10):4951-60.
- 506 33. Ulbrecht M, Couturier A, Martinuzzi S, Pla M, Srivastava R, Peterson PA, et al. Cell  
507 surface expression of HLA-E: interaction with human beta2-microglobulin and allelic  
508 differences. *European journal of immunology.* 1999;29(2):537-47.
- 509 34. Grimsley C, Ober C. Population genetic studies of HLA-E: evidence for selection.  
510 *Human immunology.* 1997;52(1):33-40.
- 511 35. Cohen GB, Gandhi RT, Davis DM, Mandelboim O, Chen BK, Strominger JL, et al. The  
512 selective downregulation of class I major histocompatibility complex proteins by HIV-1  
513 protects HIV-infected cells from NK cells. *Immunity.* 1999;10(6):661-71.
- 514 36. Apps R, Del Prete GQ, Chatterjee P, Lara A, Brumme ZL, Brockman MA, et al. HIV-1  
515 Vpu Mediates HLA-C Downregulation. *Cell host & microbe.* 2016;19(5):686-95.
- 516 37. Bachtel ND, Umvilighozo G, Pickering S, Mota TM, Liang H, Del Prete GQ, et al. HLA-  
517 C downregulation by HIV-1 adapts to host HLA genotype. *PLoS pathogens.*  
518 2018;14(9):e1007257.
- 519 38. Tomasec P, Braud VM, Rickards C, Powell MB, McSharry BP, Gadola S, et al. Surface  
520 expression of HLA-E, an inhibitor of natural killer cells, enhanced by human cytomegalovirus  
521 gpUL40. *Science.* 2000;287(5455):1031.
- 522 39. Walters LC, Harlos K, Brackenridge S, Rozbesky D, Barrett JR, Jain V, et al. Pathogen-  
523 derived HLA-E bound epitopes reveal broad primary anchor pocket tolerability and  
524 conformationally malleable peptide binding. *Nature communications.* 2018;9(1):3137.

525  
526

### 527 Figure Legends

528 **Fig. 1. Dimorphism at position -21 HLA-B does not significantly modulate HLA-E and NKG2A**  
529 **expression.** (A) HLA haplotypes encoding HLA-C1 and C2 within groups of -21 HLA-B genotype M/M  
530 homozygous -21M/T heterozygous and -21 T/T homozygous subjects from the study cohort. (B)  
531 Comparison of cell-surface HLA-E expression (MFI of staining with HLA-E-specific antibody 3D12) on  
532 total PBMC between groups. Data are displayed as violin plots; the group median and interquartile  
533

533 range are indicated. (C) Proportion of CD56<sup>dim</sup> NK cells (Live CD56+CD3-CD19-CD14-CD4- PBMC)  
534 expressing NKG2A between groups and comparison of the percentage of NKG2A+ CD56<sup>dim</sup> with their  
535 level of surface expression (MFI) in M/M (black dots), M/T (blue dots) and T/T (red dots) subjects.  
536 (D) Violin plots of the frequency of NKG2C expressing CD56<sup>dim</sup> NK cells in the donor groups. Group  
537 median and interquartile range are indicated. All donors were HCMV positive.

538

539 **Fig. 2. No significant differences in HLA-C expression levels in subjects grouped according to -21**  
540 **HLA-B dimorphism.** Levels of surface expression of HLA-C (MFI of staining with antibody DT-9) on  
541 total PBMC in donors grouped: (A) by HLA-B -21 variant (data are shown as violin plots, and group  
542 median and quartiles are indicated); (B) according to HLA-C1 and C2 epitopes and (C) by the  
543 presence and absence of (x) of HLA-C\*07. In panels (B) and (C), M/M subjects are shown as black  
544 dots, M/T as blue dots and T/T as red dots.

545

546 **Fig. 3. Lack of a dominant effect of -21M HLA-B on the extent of NKG2A driven NK cell**  
547 **differentiation.** (A) VisNE analysis of multiparametric flow data was performed on CD56<sup>dim</sup> NK cells  
548 from the compiled M/M, M/T and T/T donors showing expression of KIRs, CD57, FcεRI-γ and PLZF.  
549 Each point on the VisNE map represents a single cell and colour depicts intensity of protein  
550 expression. (B) Summary violin plots of the proportion of CD56<sup>dim</sup> NK cells expressing KIRs, CD57,  
551 FcεRI-γ and PLZF between donor groups. (C) SPICE analysis pie charts for each group. The pie slices  
552 represent the proportion of CD56<sup>dim</sup> NK cells expressing different receptor combinations, and the pie  
553 arcs depict expression of individual receptors, as detailed in the key. (D) Summary violin plots  
554 showing the proportion of CD57+CD56<sup>dim</sup> NK cells expressing CD16 between the donor groups.

555

556 **Fig. 4. Variable influence of -21 HLA-B dimorphism on ADCC responses.** (A) IFN-γ and (B) CD107a  
557 expression by CD56<sup>dim</sup> NK cells following co-culture with RAJI cells coated with anti-CD20 (filled  
558 circles) or murine IgG (filled squares) in M/M (n=10), M/T (n=10) and T/T donors (n=13) with  
559 available PBMC. (C) SPICE pie charts for each group. The pie slices correspond to the proportion of  
560 IFN-γ producing cells that express different receptor combinations, and the pie arcs depict individual  
561 expression of CD57, KIRs and NKG2A, as detailed in the key. (D) Correlations between IFN-γ  
562 production by CD56<sup>dim</sup> NK cells and expression of CD16, CD57, KIRs, NKG2C or soluble HLA-G levels.  
563 The nonparametric Spearman test was used for correlation analysis.

564

## 565 Supporting Information

### 566 Supplementary Table 1. Cohort characteristics and HLA genotypes.

567 **S1. Suppl. Fig. 1 The effect of HLA-A expression on surface HLA-E expression and HIV viral load**  
568 **(VL) by HLA-B -21 variant.** (A) Surface expression levels of HLA-E (MFI) on total PBMC, according to  
569 HLA-A (z score) and HLA-B dimorphism in the study cohort. (B) Correlation of HLA-A expression  
570 levels (z score) with HIV VL in HLA-B -21M/M and T/T donors.

571 **S2. Suppl. Fig. 2 NK cell subset redistribution.** Summary box and violin plots of the frequencies of  
572 (A) CD56<sup>bright</sup>, (B) CD56<sup>dim</sup> and (C) CD56<sup>neg</sup> NK cell subsets among M/M, M/T and T/T donors. NK cells  
573 were gated on live CD3-CD14-CD19-CD4- and subsets identified on the basis of CD56 and CD16  
574 expression. Median and interquartile range is shown.

575 **S3. Suppl. Fig. 3 (A)** Heat map representation of the mean proportion of expression of the markers  
576 as shown within the CD56<sup>dim</sup> CD57+ and CD57- fractions in M/M, M/T and T/T subjects.

**A**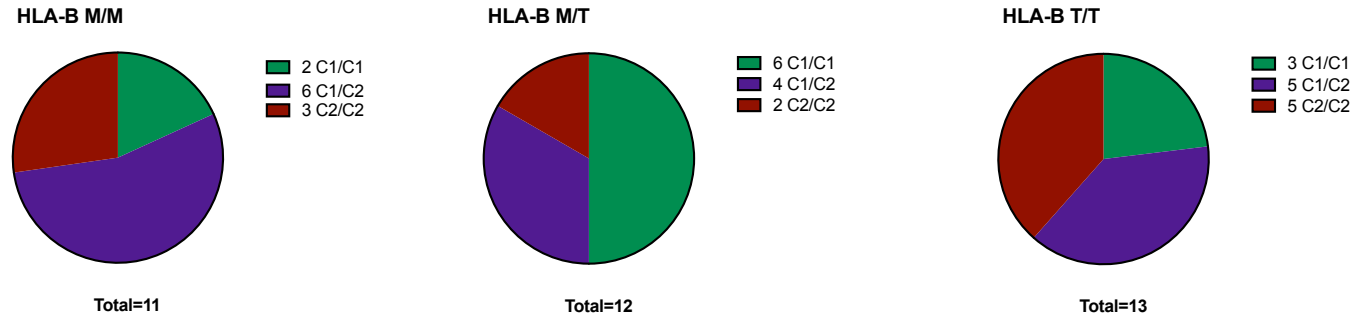**B**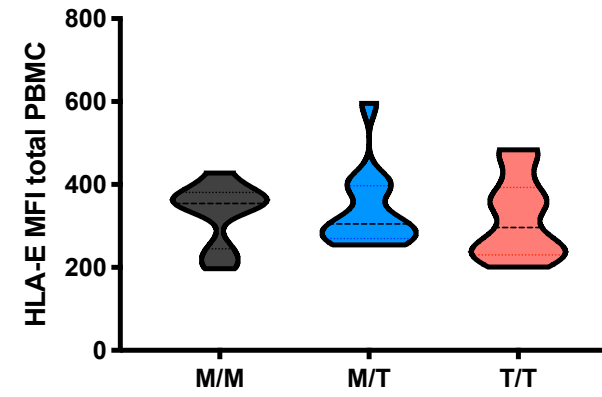**C**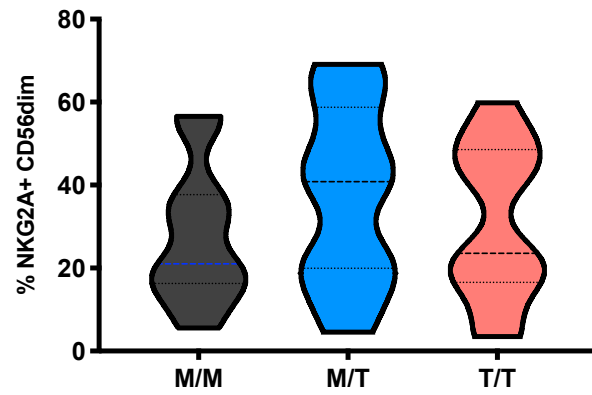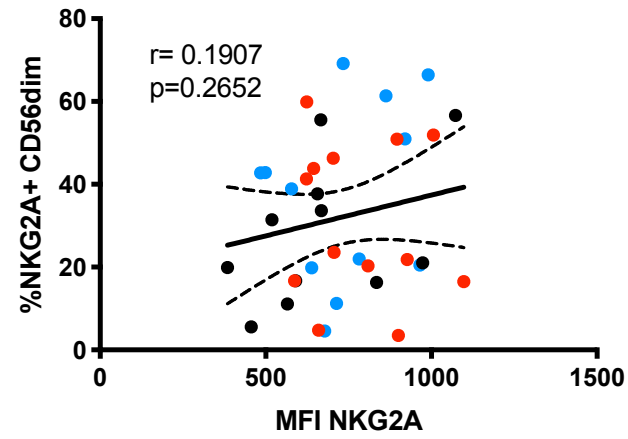**D**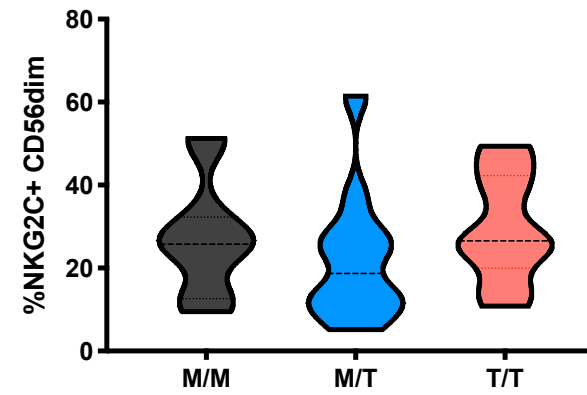

Fig. 1.

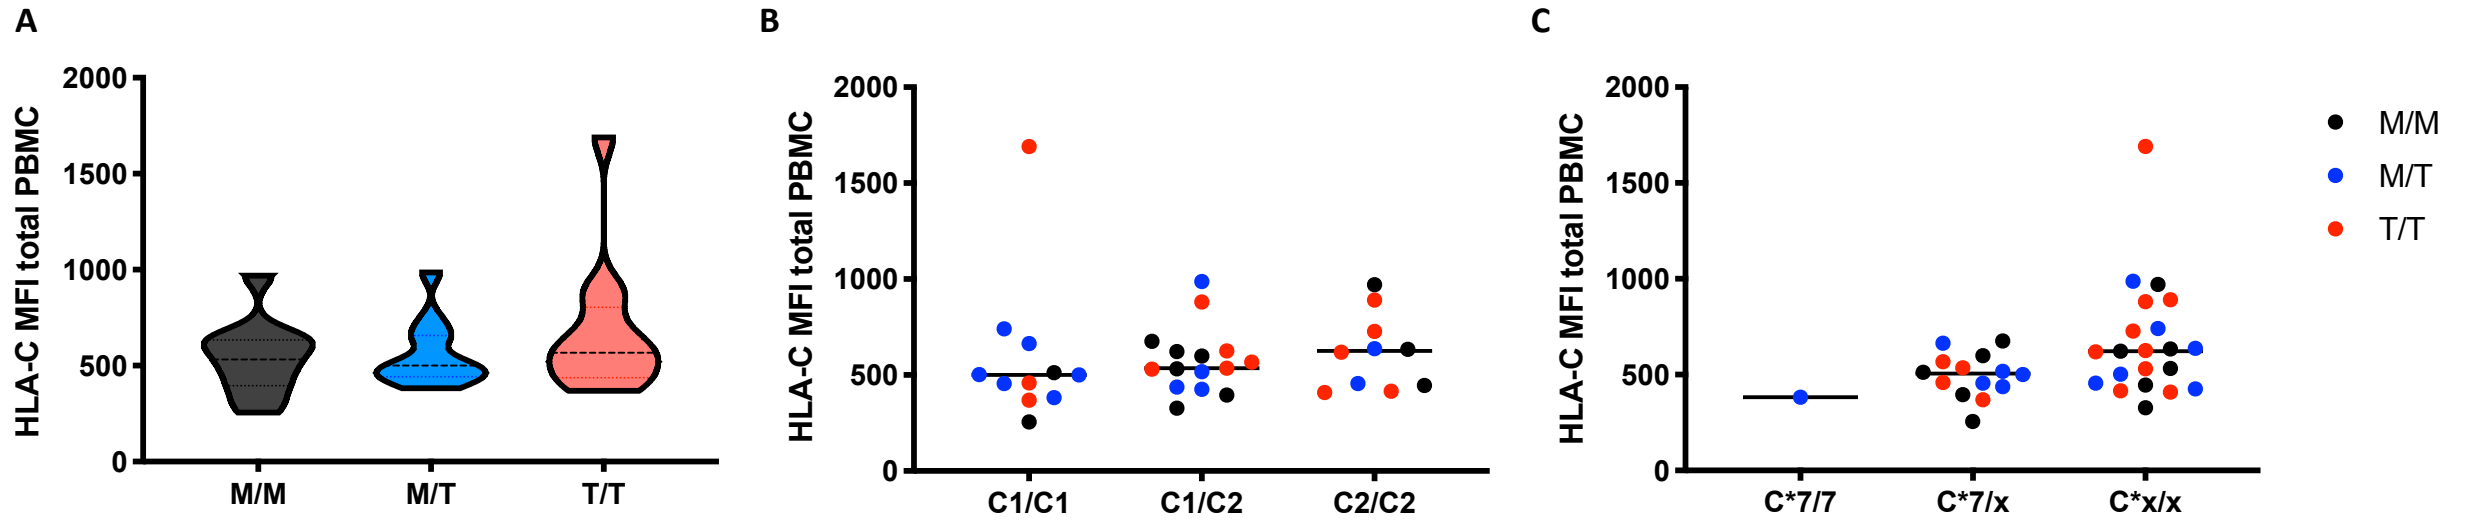

Fig. 2

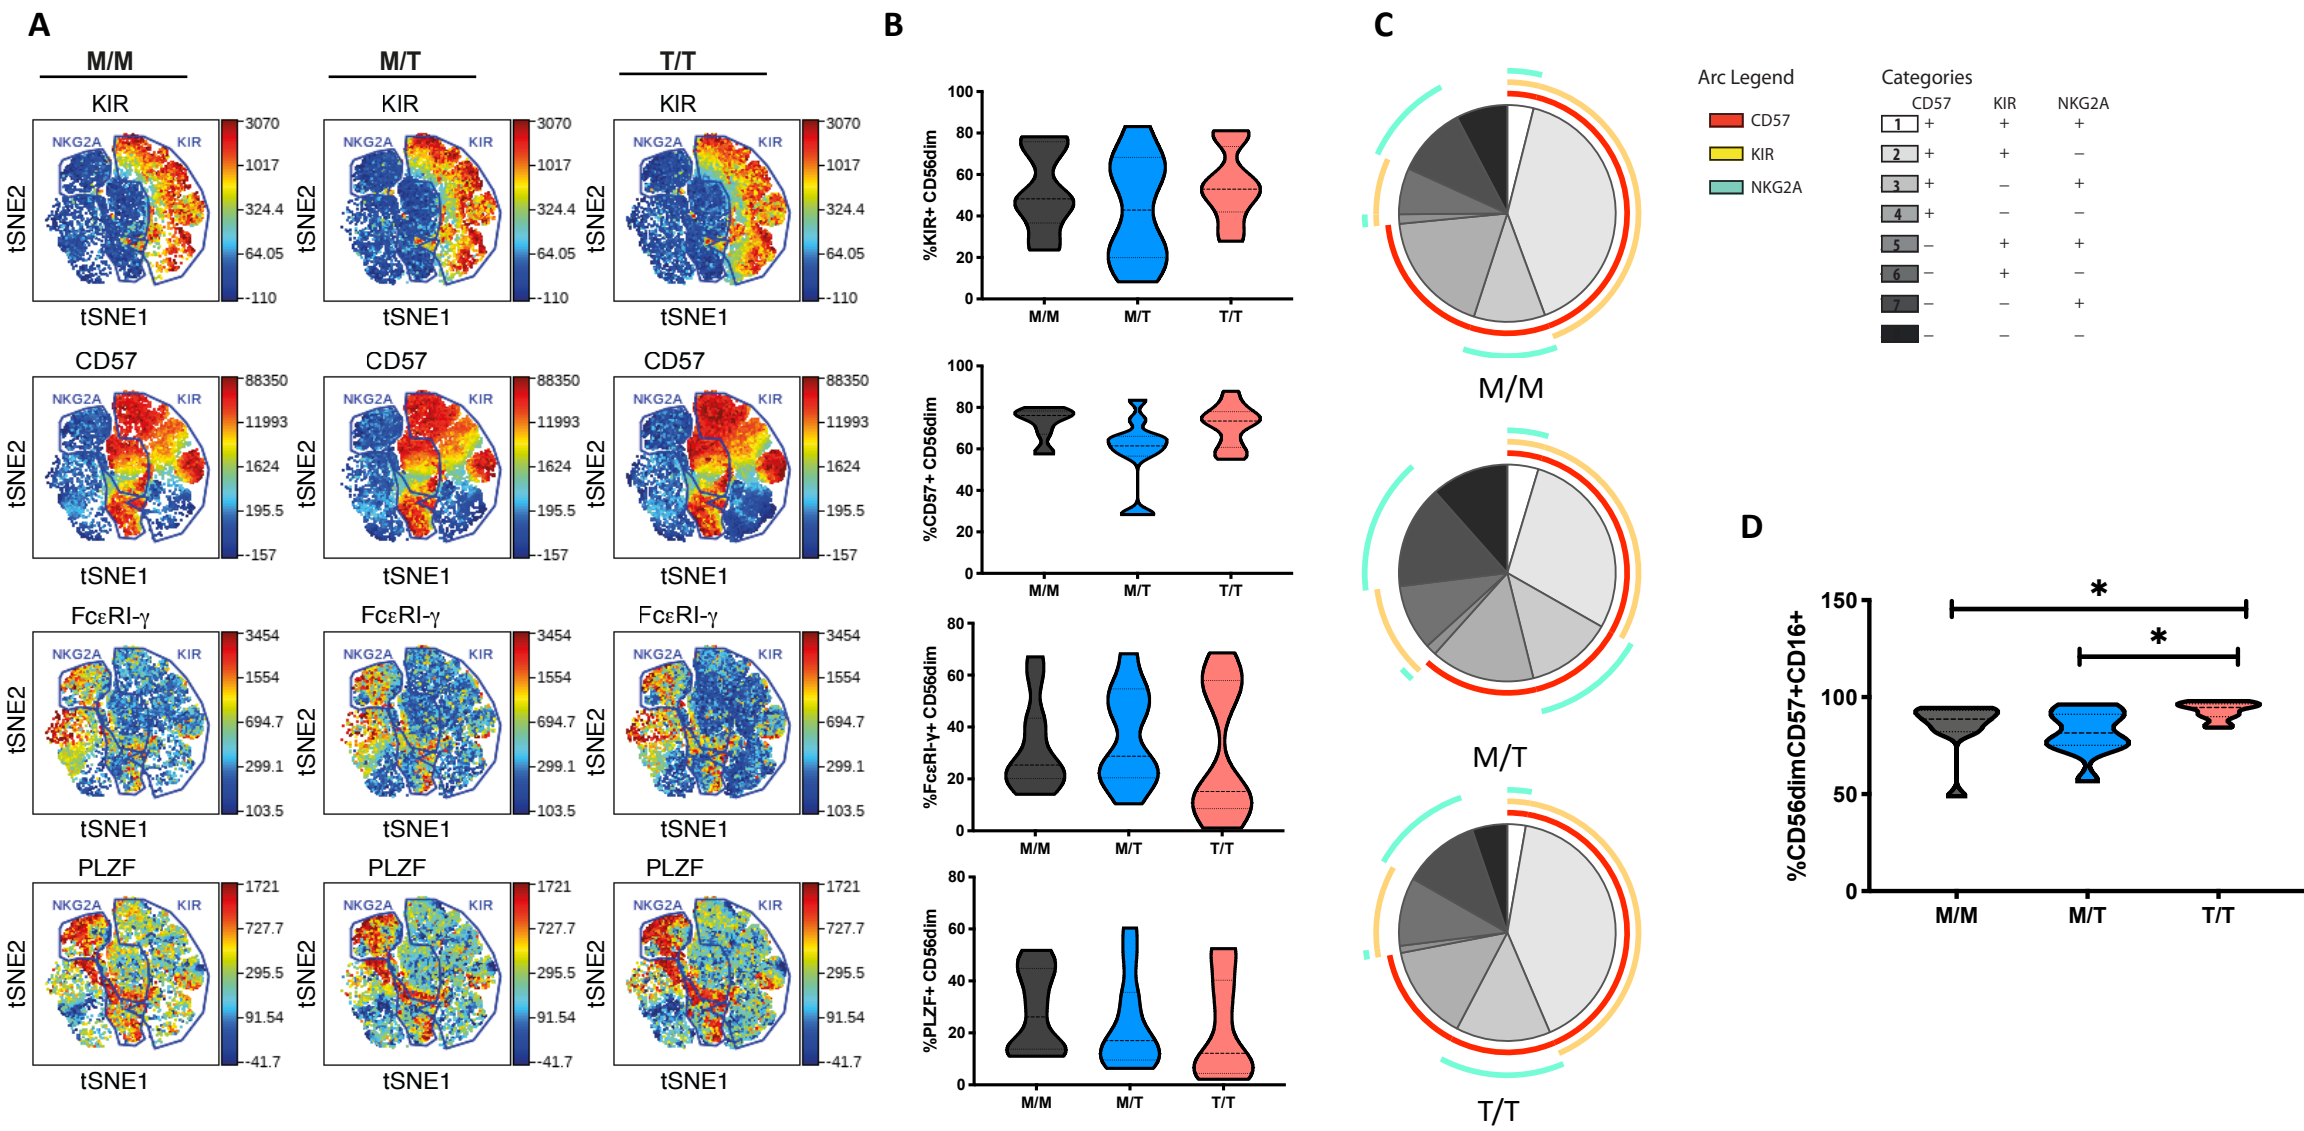

Fig. 3

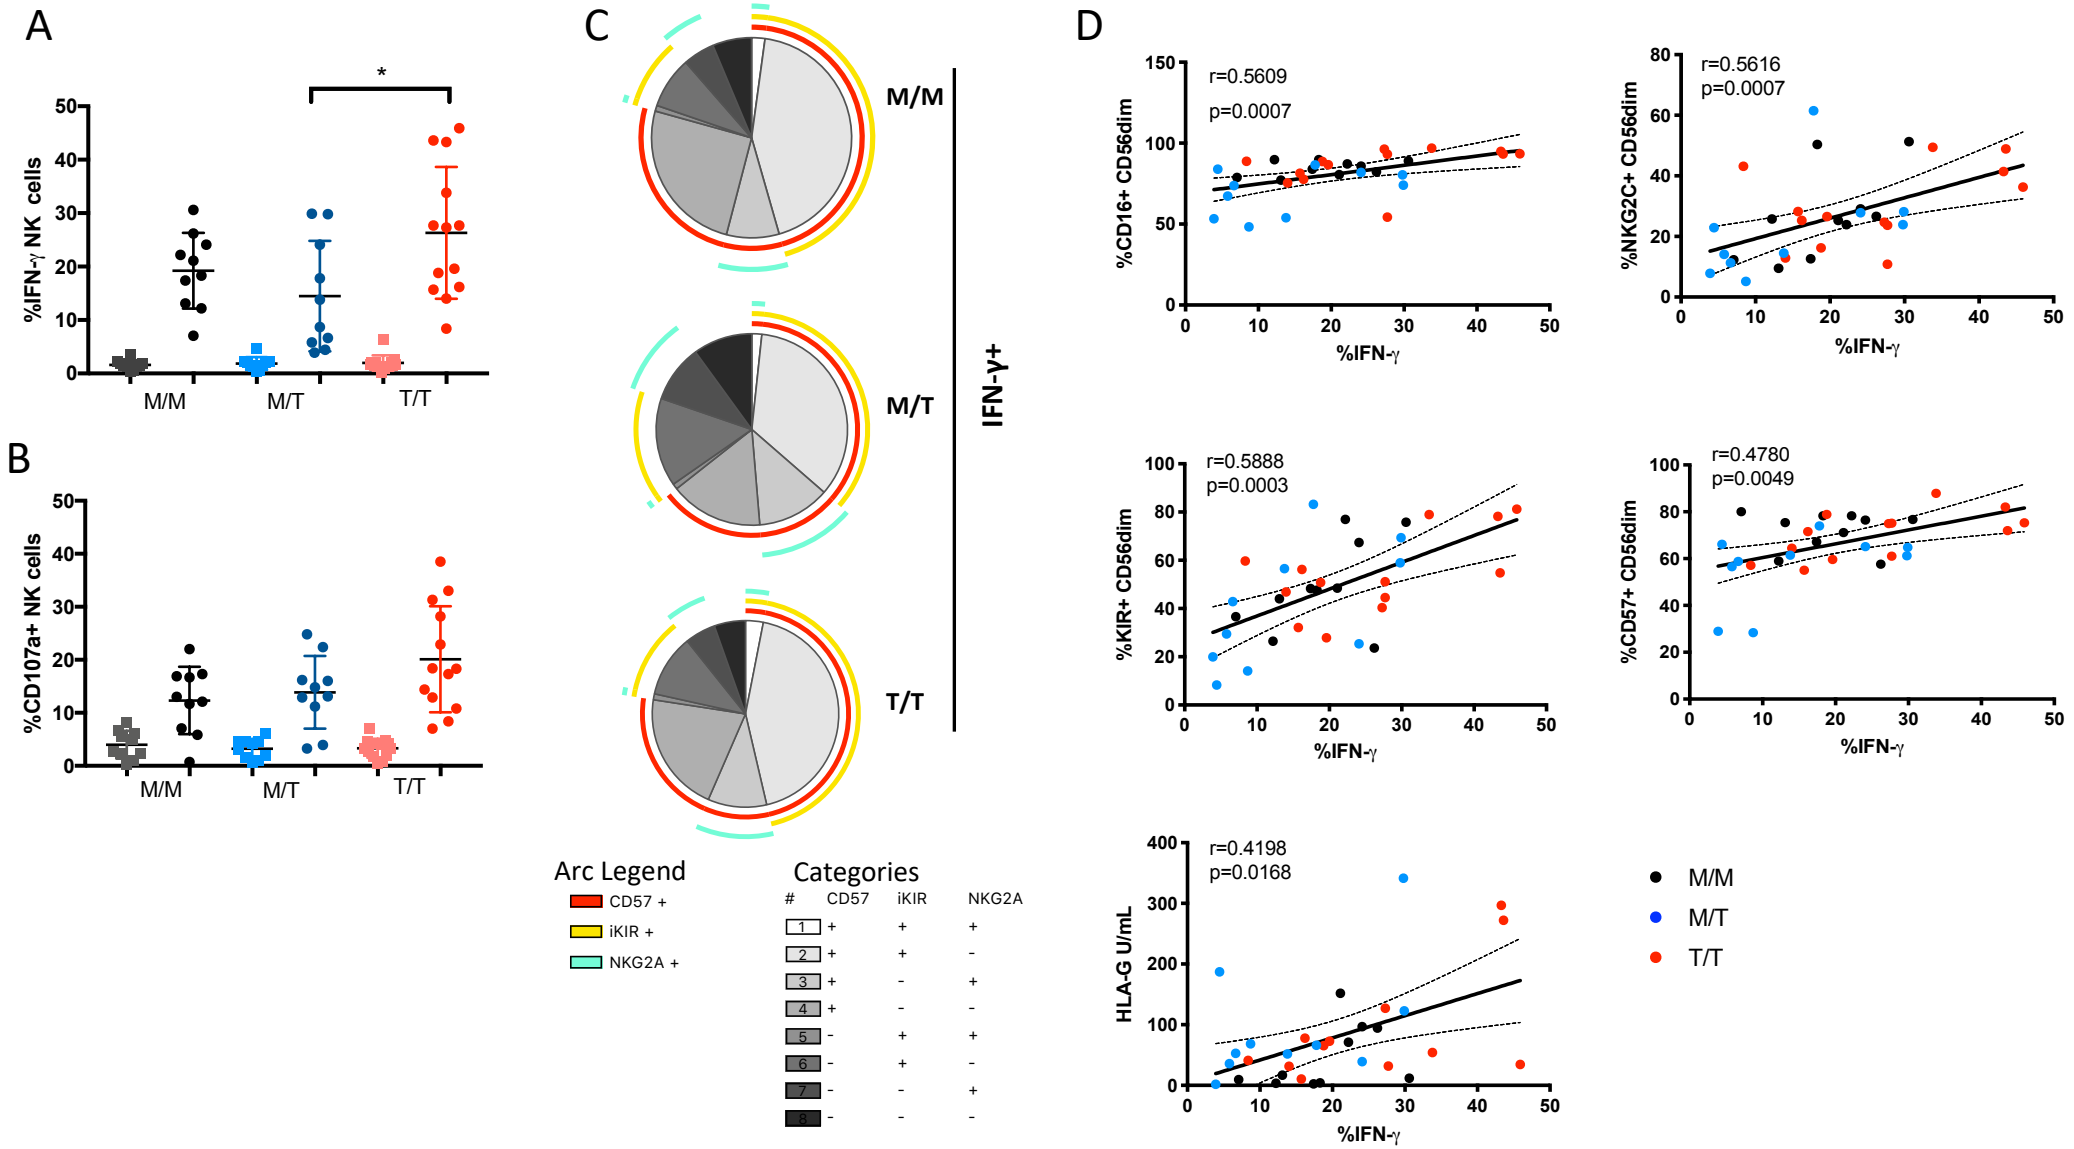

Fig. 4
